# Supplementary material for: Treatment of Porphyromonas gulae infection and downstream pathology in the aged dog by lysine‐gingipain inhibitor COR388
Source: PubMed Central journal article supplement (PMC6990966; doi:10.1002/prp2.562), 2020-01-30

Figure 1C W83

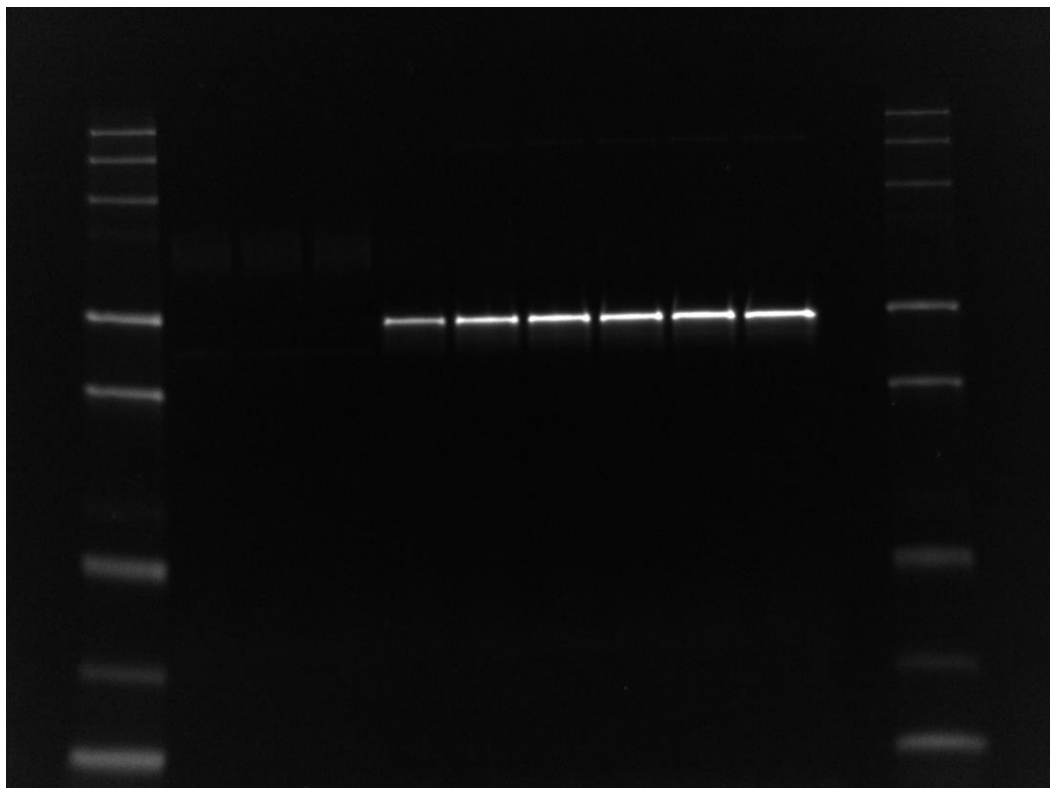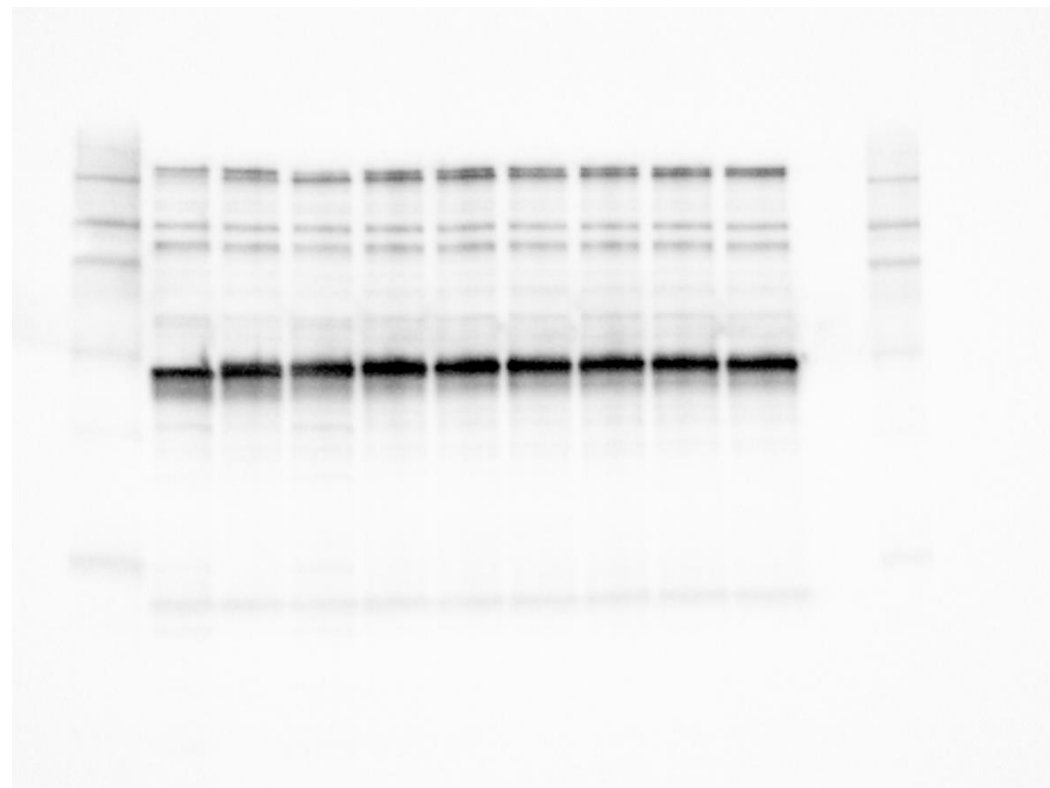

Figure 1C *P. gulae*

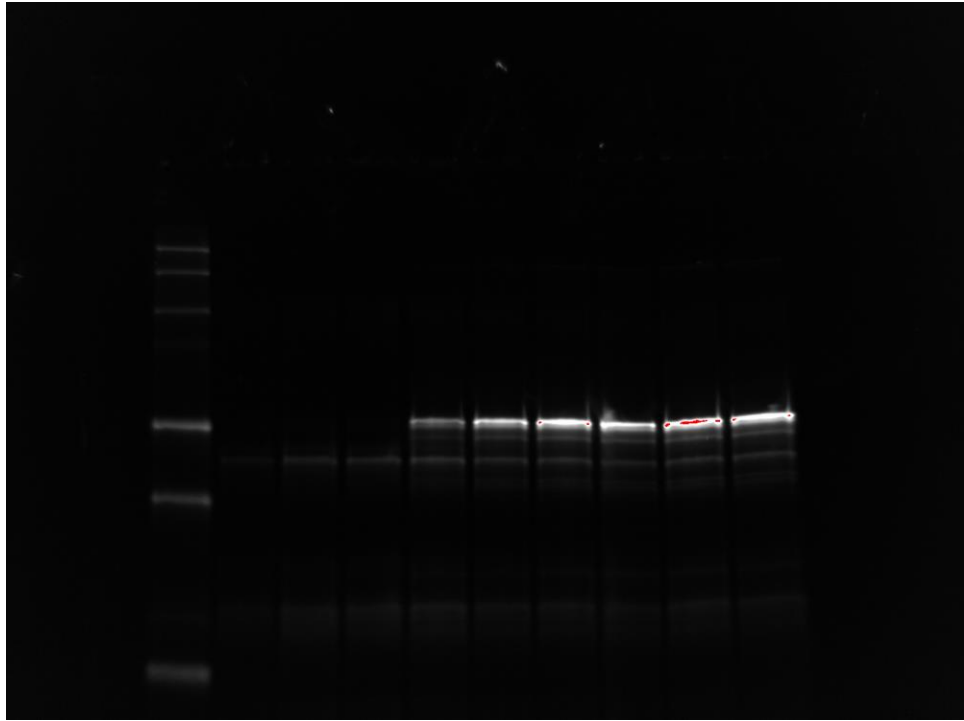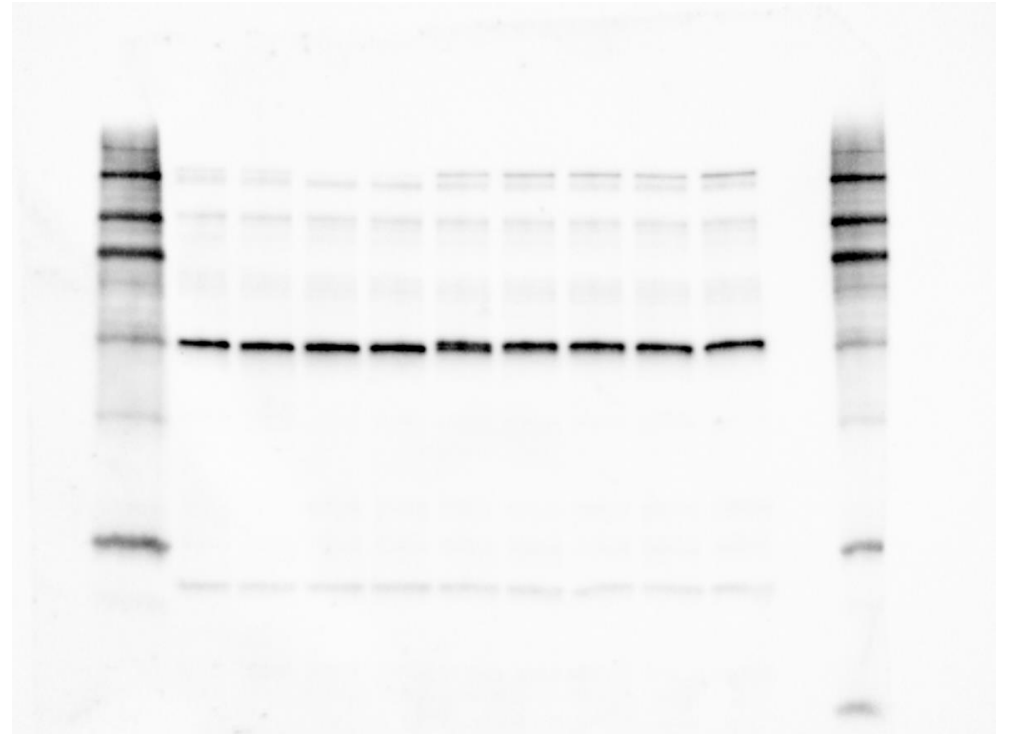

# Figure 3C GCF – D02 study

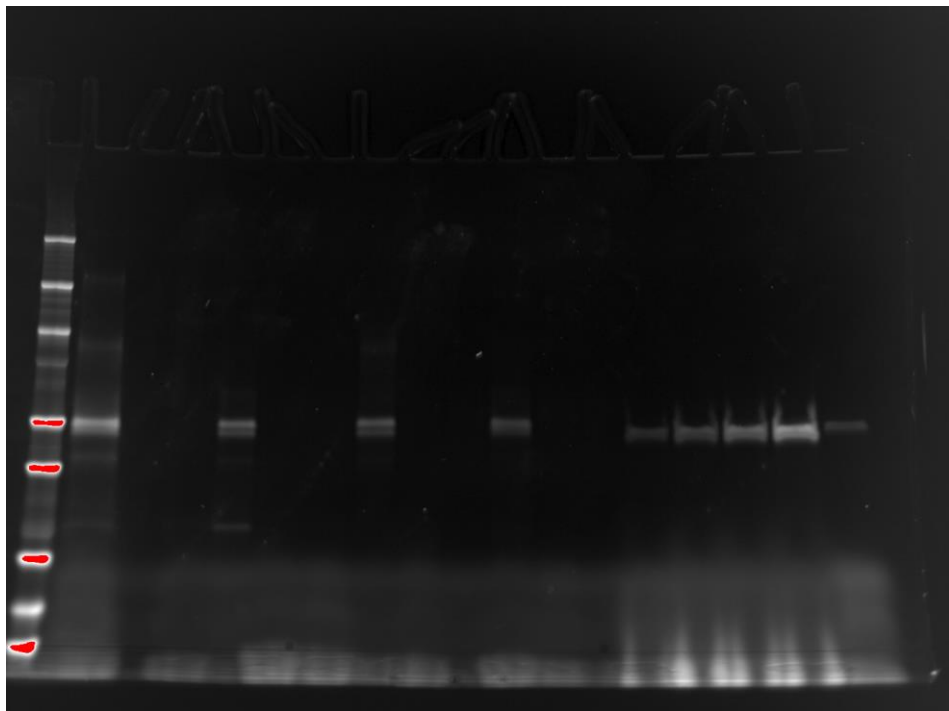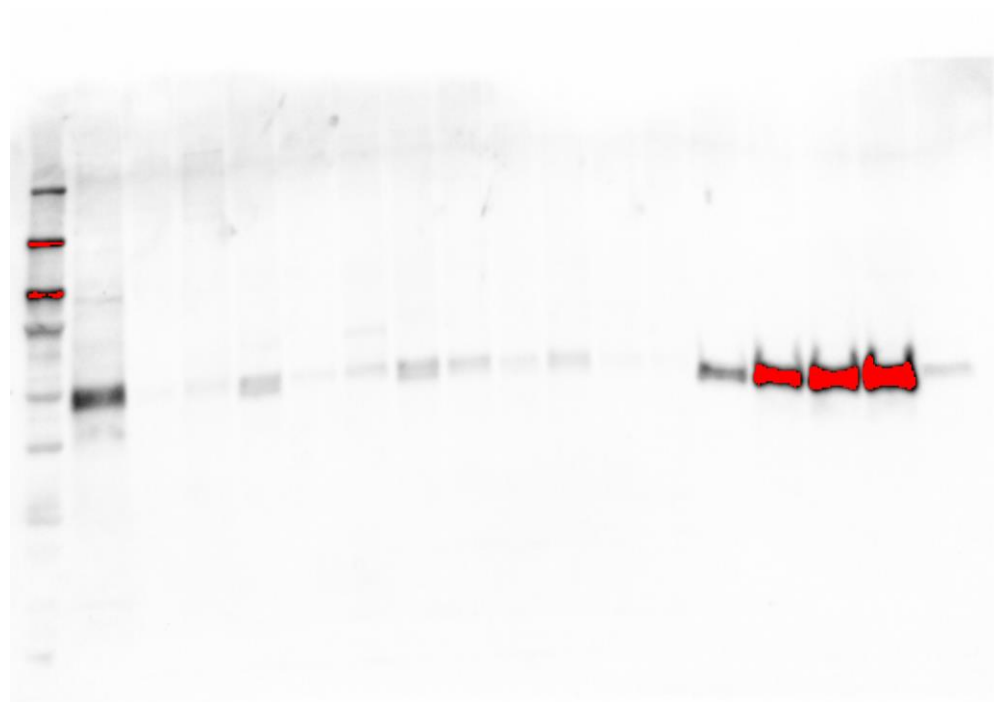

# Figure 3C SGP - D02 study

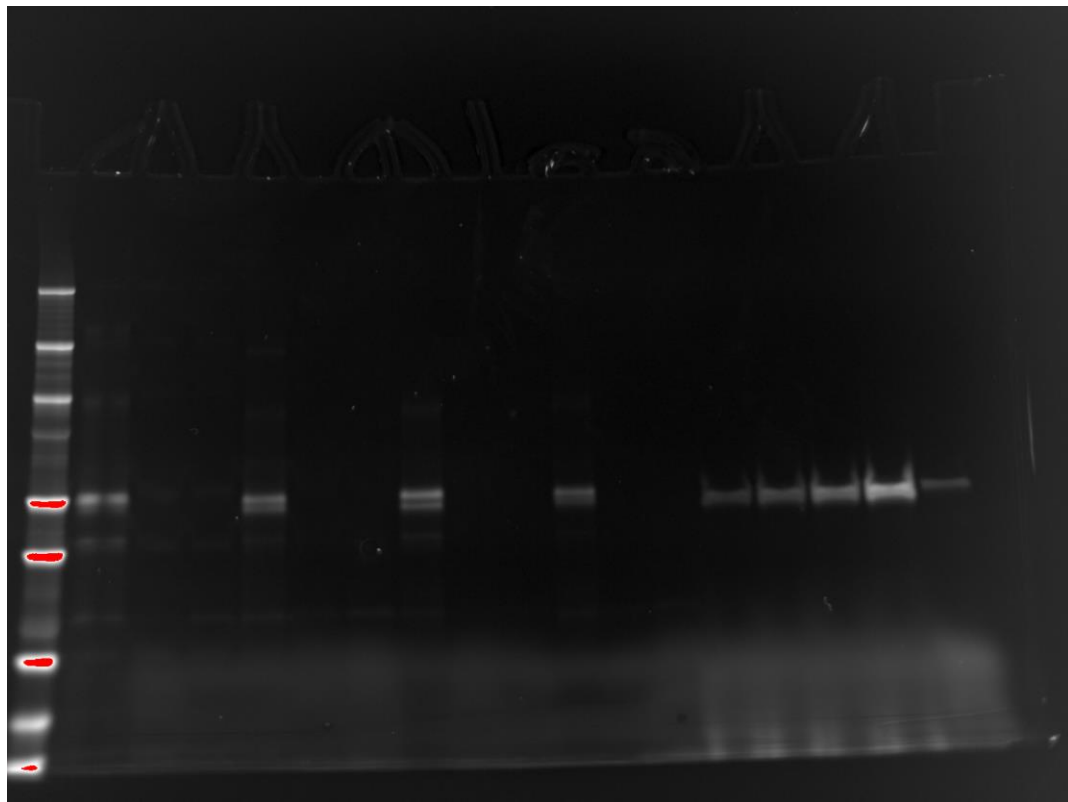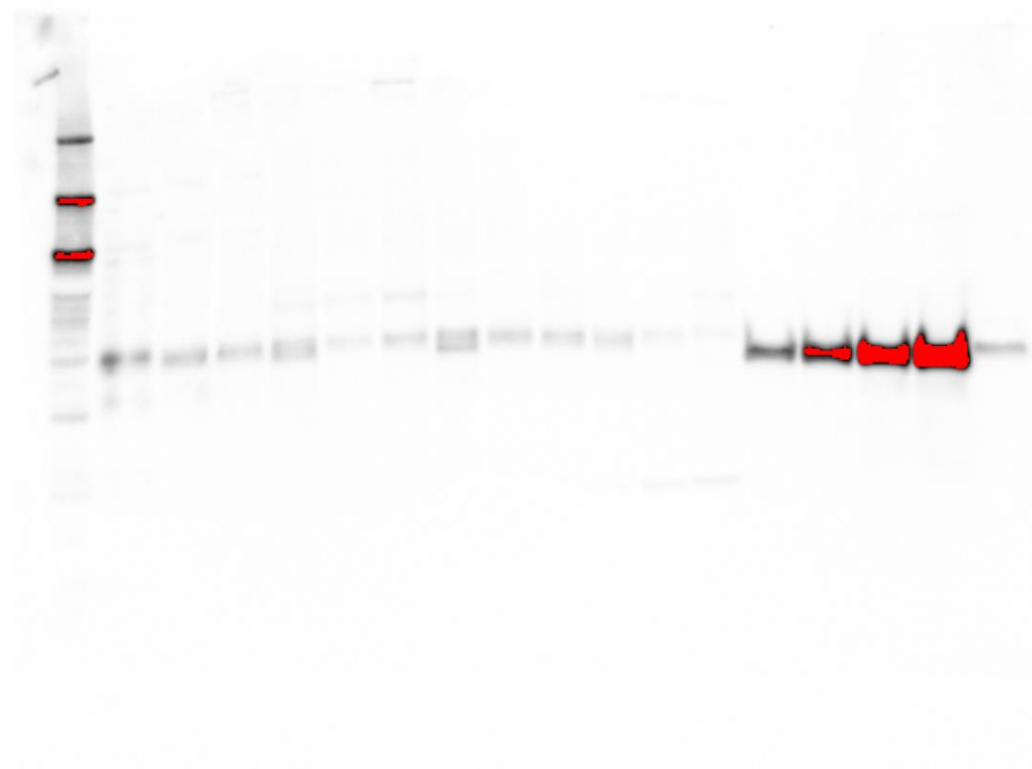

# Supplemental Figure 1 A -- vehicle

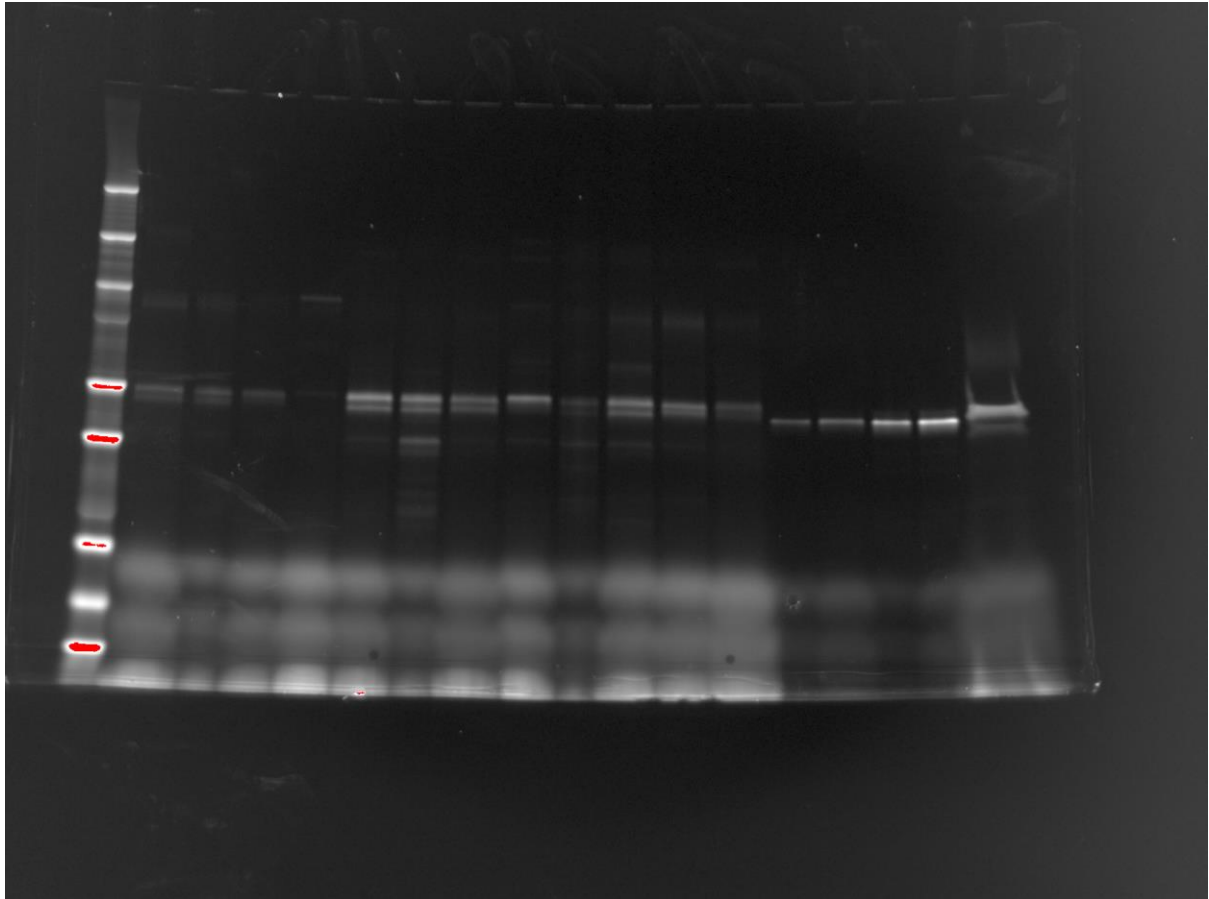

# Supplemental Figure 1 B -- 0.15 mg kg<sup>-1</sup>

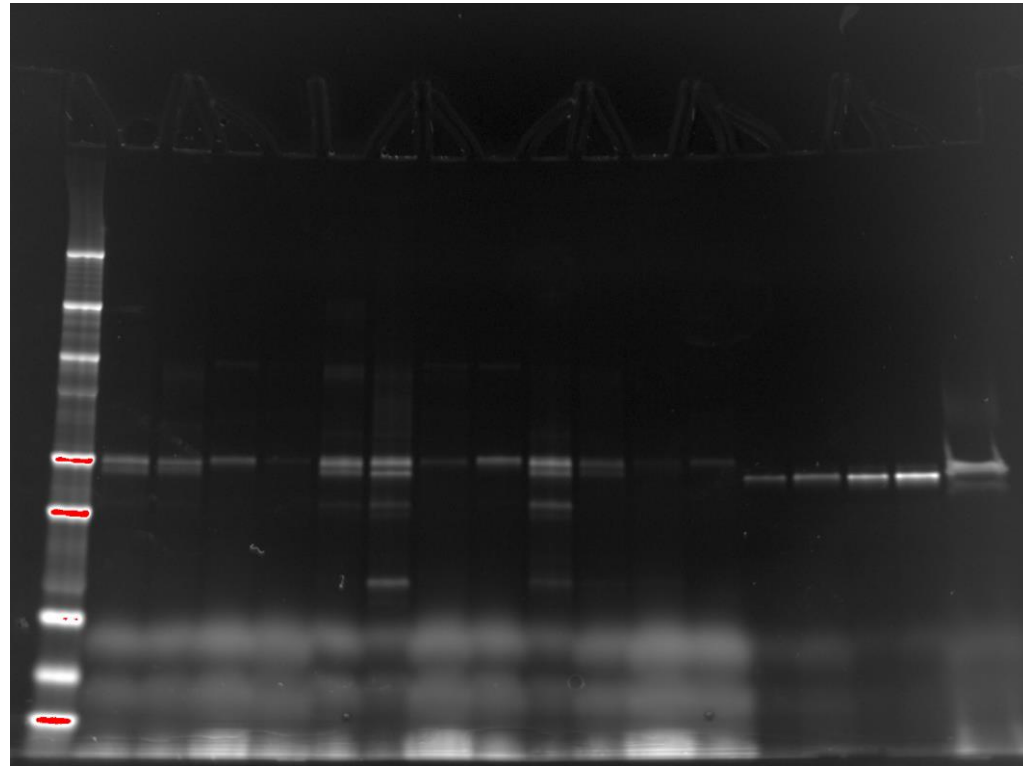

Supplemental Figure 1 C -- 0.5 mg kg<sup>-1</sup>

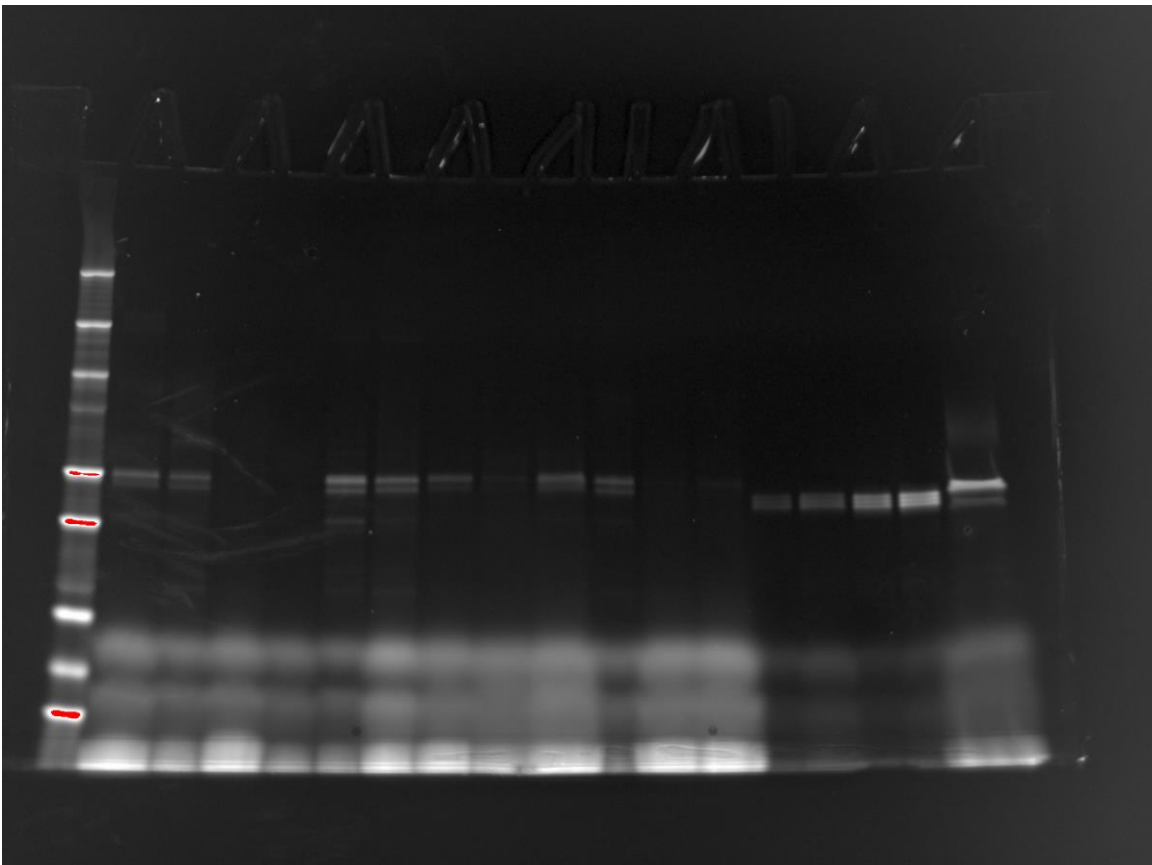

Supplemental Figure 1 D -- 1.5 mg kg<sup>-1</sup>

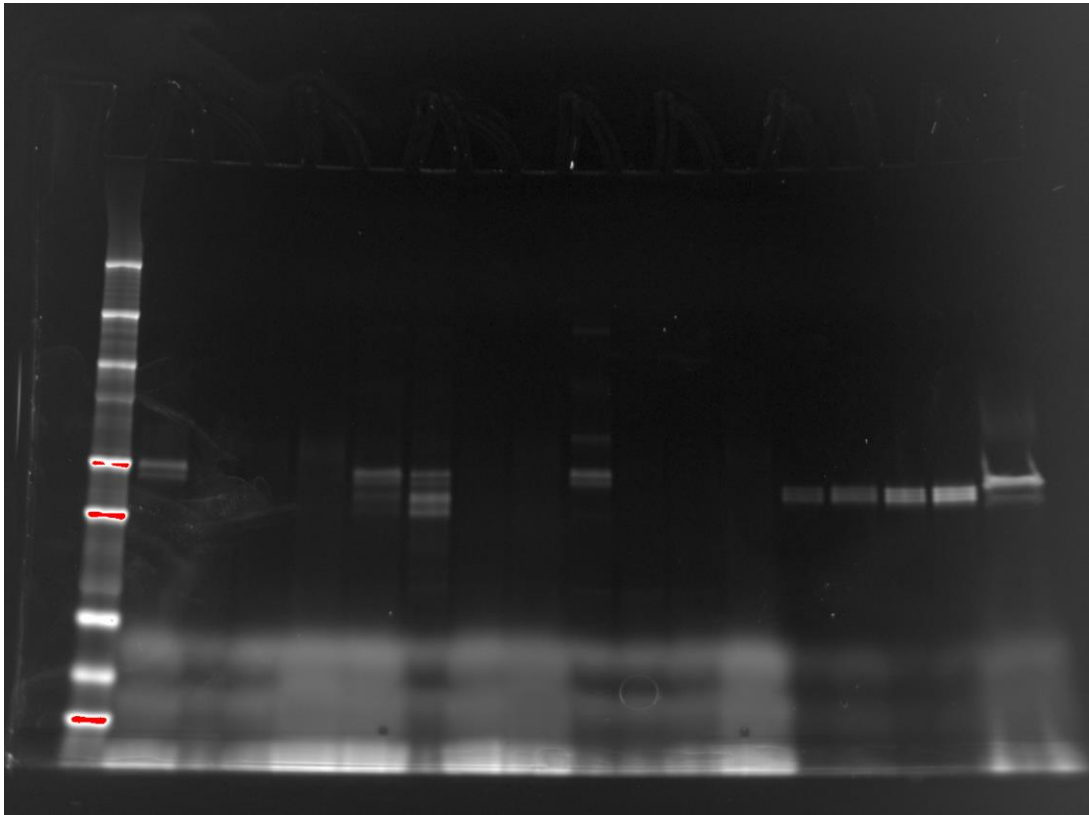



Supplemental Figure 1 E -- 12 hr

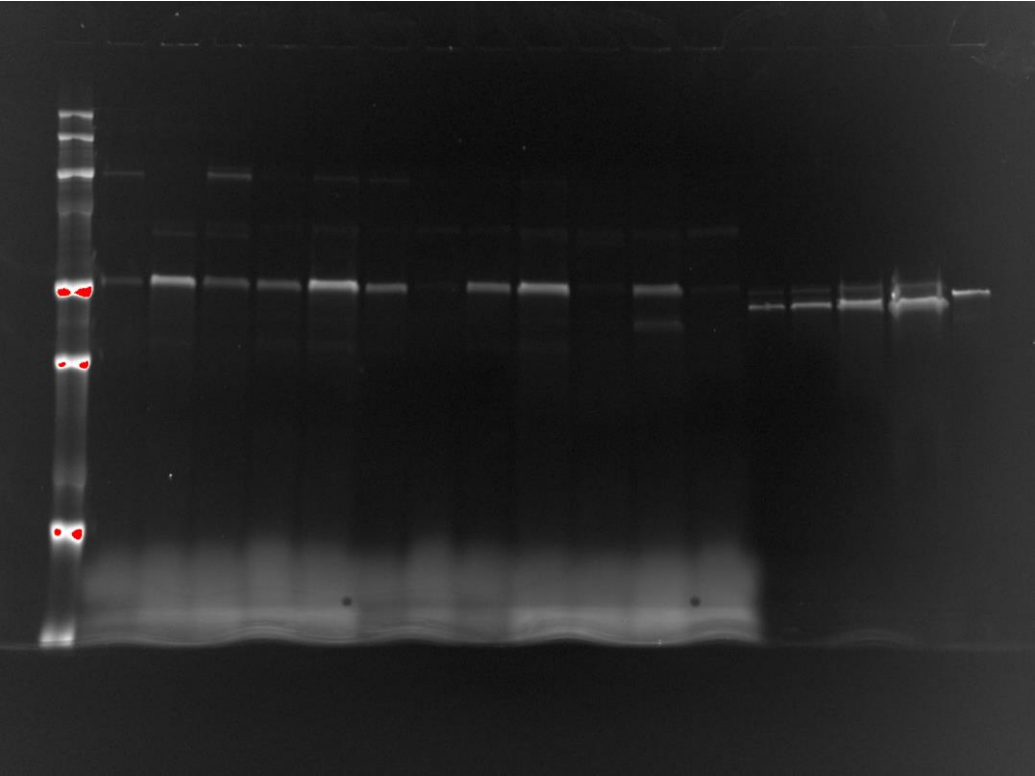

Figure 5B – day 90

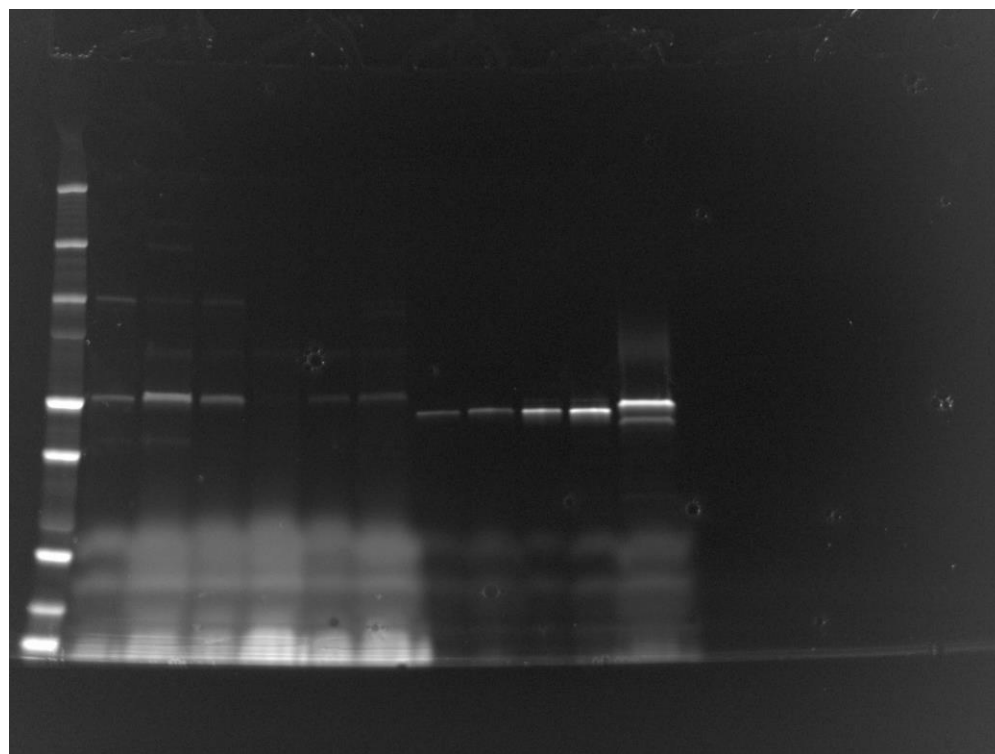

Original image  
for Figure 6A

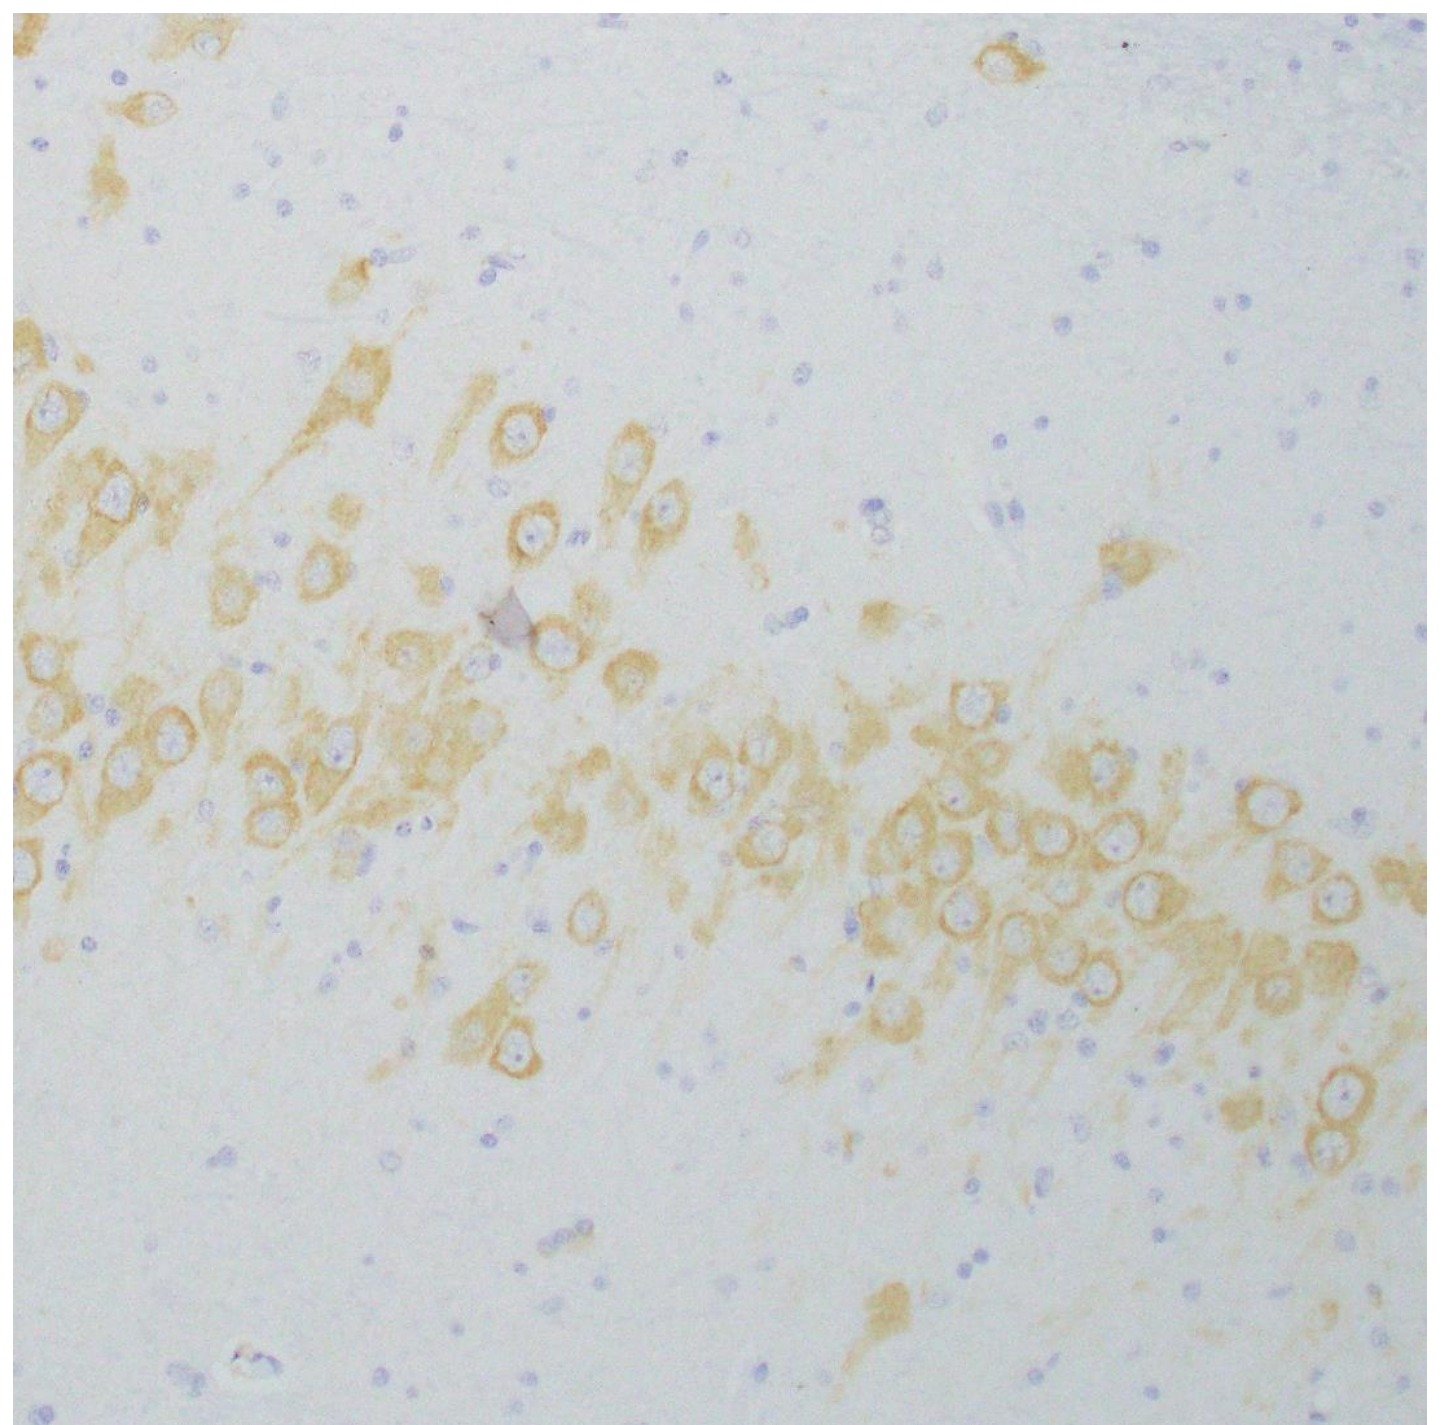



Original image  
for Figure 6B

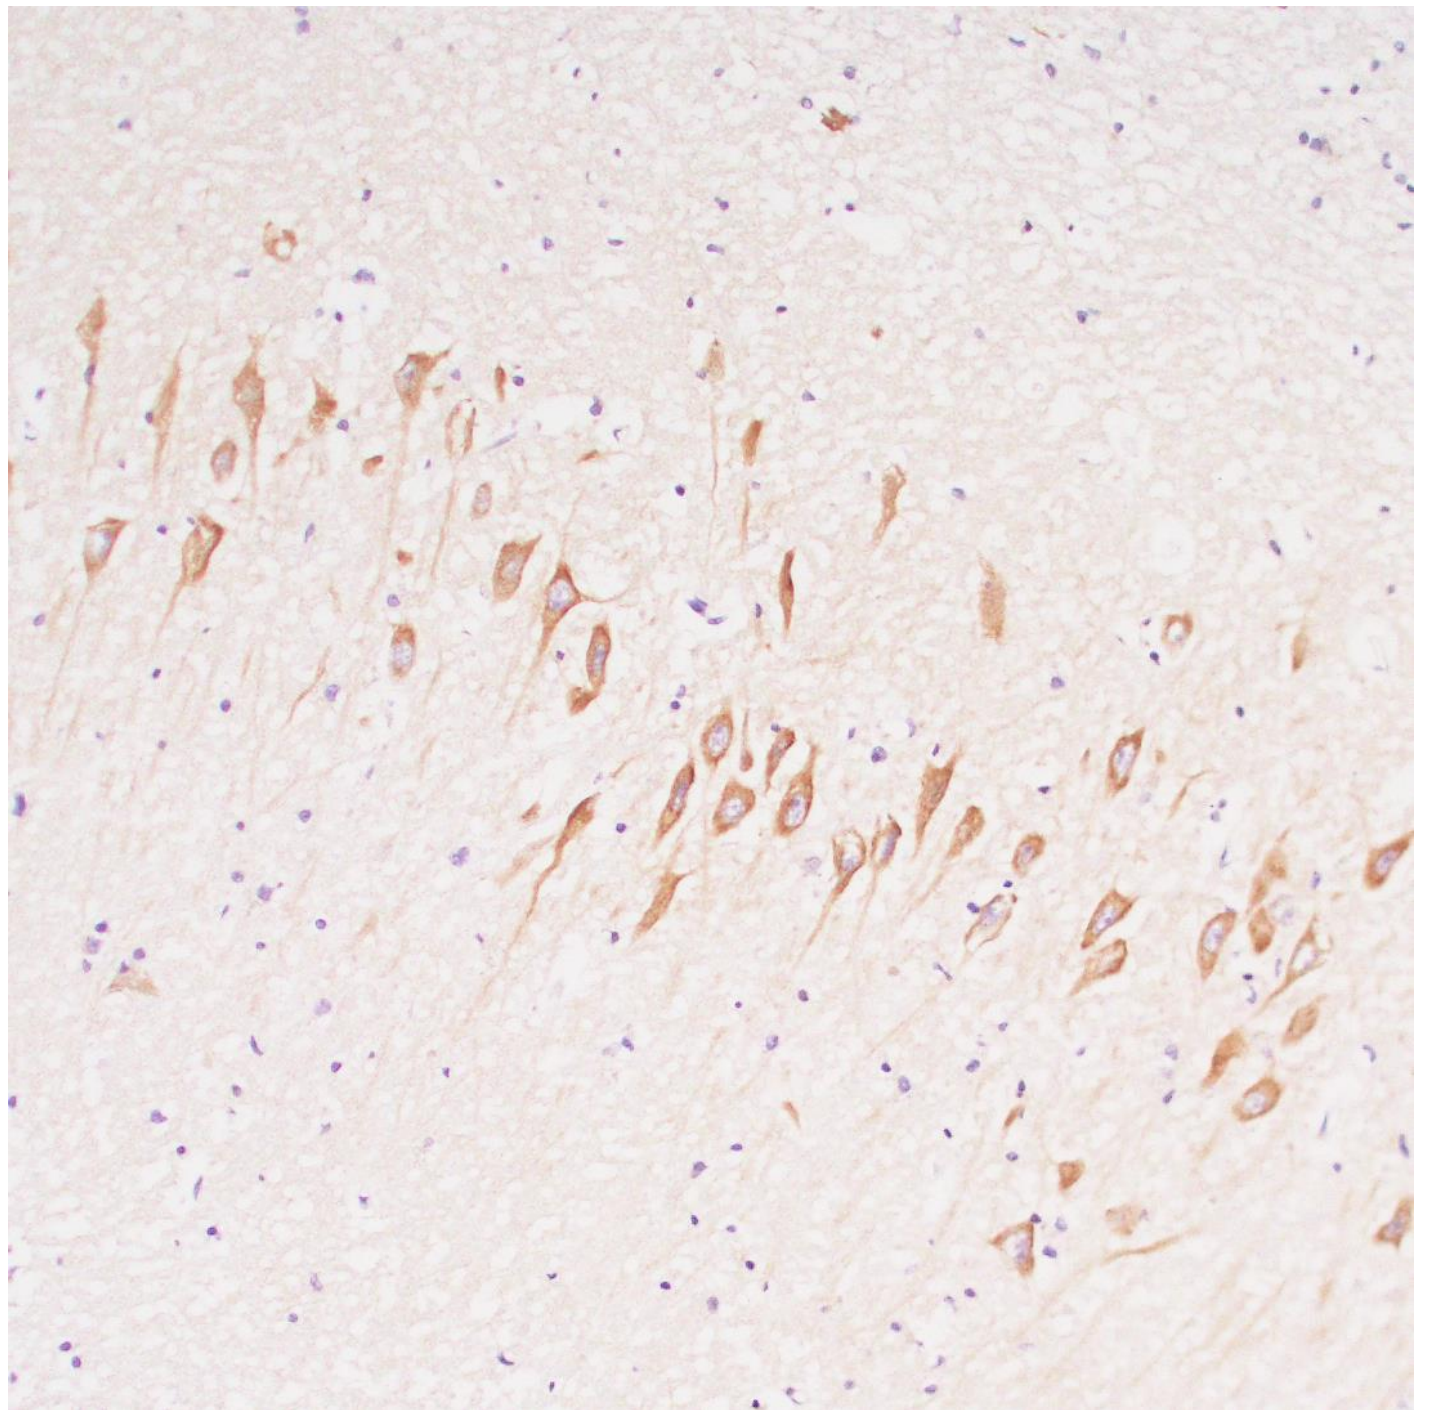

Figure 6C

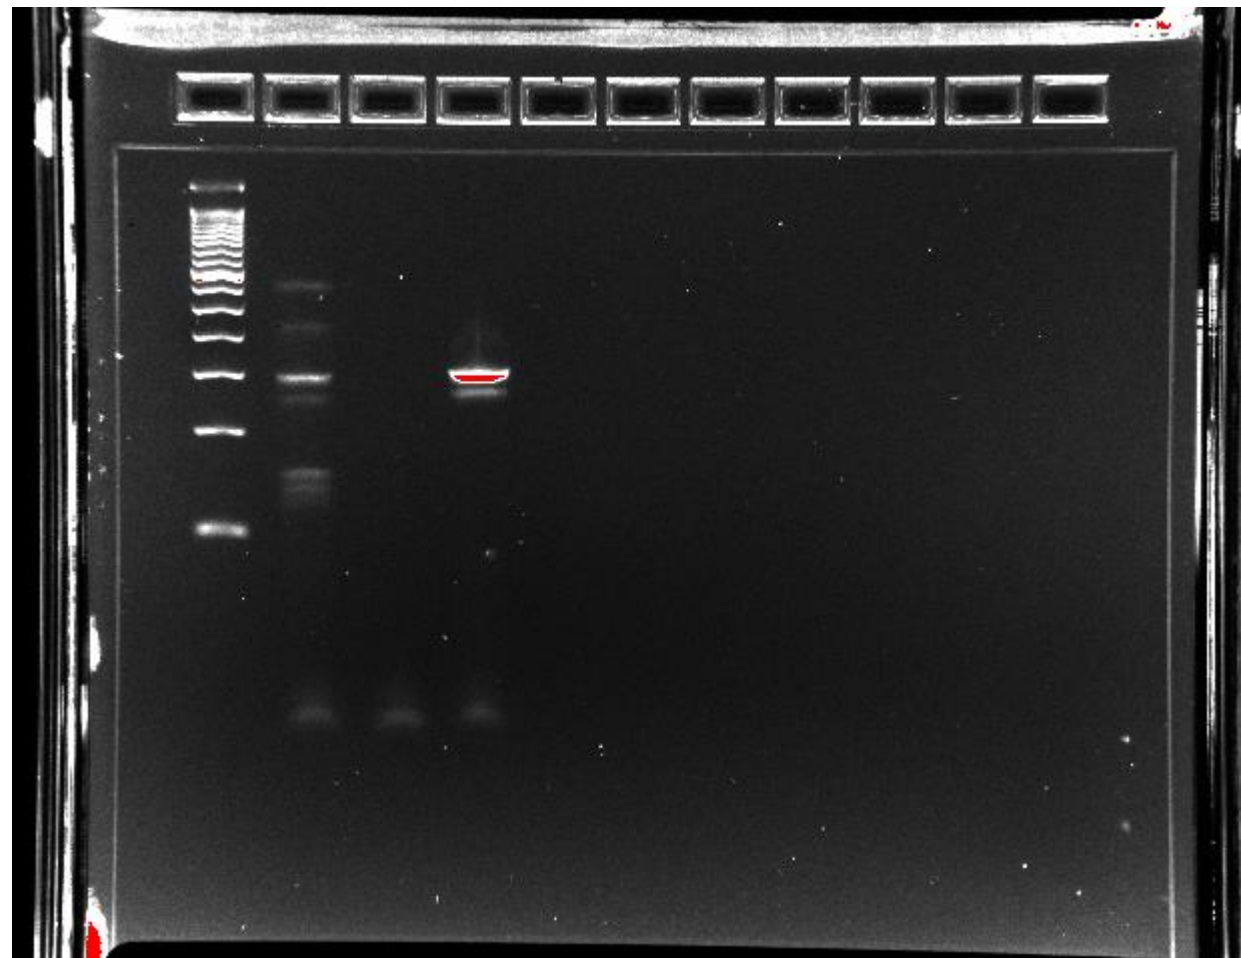

Supplement: PRP2-8-e00562-s001.pdf [file PRP2-8-e00562-s001.pdf]
